# Supplementary material
Source: PubMed Central journal article supplement (PMC4078797)
Supplement: 1323941111_pnas.201323941SI.pdf [file 1323941111_pnas.201323941SI.pdf]

# Supporting Information

Park et al. 10.1073/pnas.1323941111

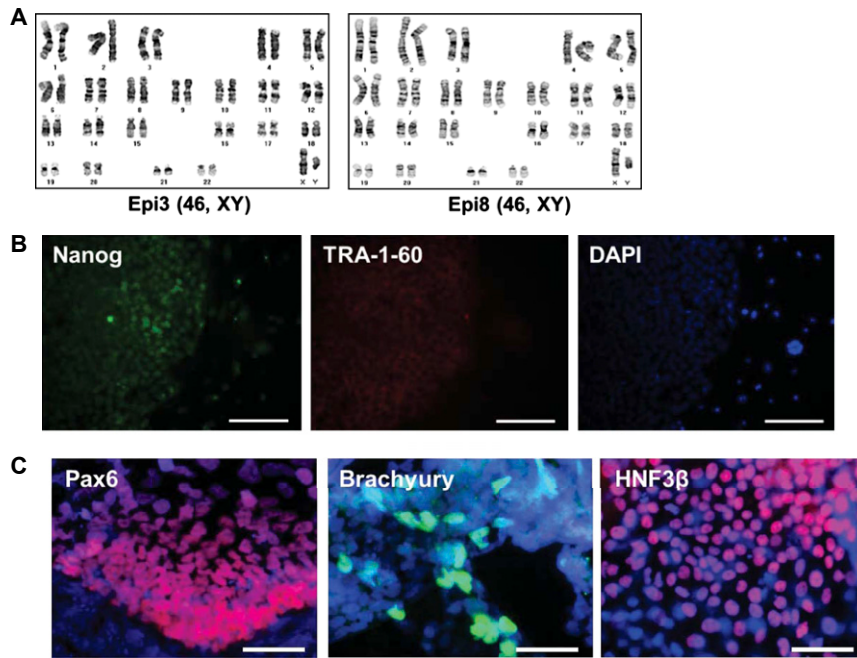

**Fig. S1.** Characterization of human induced pluripotent stem cells (iPSCs) generated by episomal reprogramming vectors. (A) Karyotype analyses were performed on chromosomes from WT-iPSC lines at passages 10 (Epi3) and 12 (Epi8). (B) Expression of Nanog and TRA-1-60, which are human embryonic stem cell (ESC)-specific surface markers, was detected by immunocytochemistry. DAPI signals indicate the total cell presence in the image. (Scale bars, 100  $\mu\text{m}$ .) (C) The expression of marker proteins representing ectoderm (Pax6), mesoderm (Brachyury), and endoderm [hepatocyte nuclear factor 3- $\beta$  (HNF3 $\beta$ )]. (Scale bars, 50  $\mu\text{m}$ .)

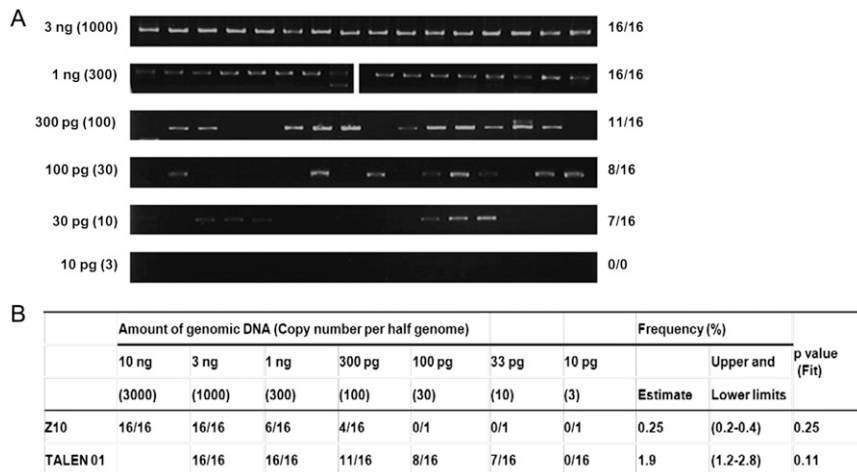

**Fig. S2.** Frequencies of targeted inversions. (A) The frequency of targeted inversions was estimated by digital PCR. Genomic DNA samples isolated from cells transfected with transcription activator-like effector nuclease (TALEN)-encoding plasmids were serially diluted and subjected to digital PCR analysis. (B) Estimated frequencies of targeted chromosomal inversions created via zinc-finger nucleases (ZFNs) or TALENs. Z10 is a ZFN pair targeting the intron1 homolog of the *F8* gene. The frequency of 140-kbp inversion events was measured by digital PCR analysis. Upper and lower limits indicate 95% confidence intervals.





**Table S3. Primer pairs used in this study**

| Primer name      | Sequence (5' to 3')       | Used for the experiment of |
|------------------|---------------------------|----------------------------|
| Homolog 1-1F     | AAATCACCCAAGGAAGCACA      | Inversion and reversion    |
| Homolog 1-1R     | TGGCATTAAACGTATTACTTGGAGA | Inversion and reversion    |
| Homolog 2-2F     | GGCAGGGATCTTGTTGGTAAA     | Inversion and reversion    |
| Homolog 2-2R     | TGCTGAGCTAGCAGGTTTAATG    | Inversion and reversion    |
| <i>GAPDH</i> -F  | CCCCTCAAGGGCATCCTGGGCTA   | qPCR and RT-PCR            |
| <i>GAPDH</i> -R  | GAGGTCCACCACCCTGTTGCTGTA  | qPCR and RT-PCR            |
| <i>Oct4</i> -F   | CCTCACTTCACTGCACTGTA      | qPCR                       |
| <i>Oct4</i> -R   | CAGGTTTTCTTTCCCTAGCT      | qPCR                       |
| <i>Sox2</i> -F   | CCCAGCAGACTTCACATGT       | qPCR                       |
| <i>Sox2</i> -R   | CCTCCCATTTCCCTCGTTTT      | qPCR                       |
| <i>Lin28</i> -F  | AGCCAAGCCACTACATTC        | qPCR                       |
| <i>Lin28</i> -R  | AGATACGTCATTCGCACA        | qPCR                       |
| <i>Nanog</i> -F  | TGAACCTCAGCTACAAACAG      | qPCR                       |
| <i>Nanog</i> -R  | TGGTGGTAGGAAGAGTAAAG      | qPCR                       |
| <i>F8</i> -F     | CTGCTTTAGTGCCACCAGAAGA    | RT-PCR                     |
| <i>F8</i> -R     | GACTGACAGGATGGGAAGCC      | RT-PCR                     |
| <i>FOXA2</i> -F  | CTACGCCAACATGAACTCCA      | RT-PCR                     |
| <i>FOXA2</i> -R  | AAGGGGAAGAGGTCCATGAT      | RT-PCR                     |
| <i>Sox17</i> -F  | AGCGCCCTTCACGTGTACTA      | RT-PCR                     |
| <i>Sox17</i> -R  | CTTGCCACACGAAGTGCAGAT     | RT-PCR                     |
| <i>GAPDH</i> -F  | GAACATCATCCCTGCCTCTACTG   | iPS generation (PCR)       |
| <i>GAPDH</i> -R  | CAGGAAATGAGCTTGACAAAGTGG  | iPS generation (PCR)       |
| <i>EBNA-1</i> -F | ATGGACGAGGACGGGAAGA       | iPS generation (PCR)       |
| <i>EBNA-1</i> -R | GCCAATGCAACTTGGACGTT      | iPS generation (PCR)       |
| 293-F            | GAGCAGGGAGGCAAGAATTA      | TALENs activity screening  |
| 293-R            | TGAGGGAAAACGCATCTAGG      | TALENs activity screening  |
